# Supplementary material for: Plastome phylogenomics of the Diverse Neotropical Orchid Genus Lepanthes with Emphasis on Subgenus Marsipanthes (Pleurothallidinae: Orchidaceae)
Source: Research Square preprint supplement (doi:10.21203/rs.3.rs-5738250/v1), 2025-02-07
Supplement: Supplementary file 1 [file 0cd739d1750028bd577a2fd4.xlsx]

## Sheet: Sup_1
Species	No. of sequenced fragments
	Raw reads	Trimmed reads	Percent after trimming
Lepanthes caprimulgus	9808624	8001216	81.6
Lepanthes eros	9312740	7150658	76.7836
Lepanthes felis	9398262	8428106	89.6773
Lepanthes hexapus	9307406	7738636	83.1449
Lepanthes manabina	10913300	8951914	82.0276
Lepanthes monoptera	10146386	8327176	82.0704
Lepanthes mucronata	9885756	7989294	80.8162
Lepanthes narcissus	13494296	11373812	84.2861
Lepanthes nicolasii	9239854	7443440	80.558
Lepanthes ribes	10216092	8130302	79.6
