# Supplementary material for: Plastome phylogenomics of the Diverse Neotropical Orchid Genus Lepanthes with Emphasis on Subgenus Marsipanthes (Pleurothallidinae: Orchidaceae)
Source: Research Square preprint supplement (doi:10.21203/rs.3.rs-5738250/v1), 2025-02-07
Supplement: Supplementary file 2 [file 37ddd226d049ac5849c4e23c.xlsx]

## Sheet: Sheet1
Region	Primer Name	Sequence	Reference
ITS	ITS1	TCCGTAGGTGAACCTGCGG	Vijayan & Tsou 2010
ITS	ITS4	TCCTCCGCTTATTGATATGC	Vijayan & Tsou 2010
matK	matK-56F	ACTTCCTCTATCCGCTACTCCTT	Williams et al. 2005
matK	matK-2.1a-Fw	ATCCATCTGGAAATCTTAGTTC	Vijayan & Tsou 2010
matK	matK-2.1a-Rv	GTTCTAGCACAAGAAAGTCG	Vijayan & Tsou 2010
