# Supplementary material for: Plastome phylogenomics of the Diverse Neotropical Orchid Genus Lepanthes with Emphasis on Subgenus Marsipanthes (Pleurothallidinae: Orchidaceae)
Source: Research Square preprint supplement (doi:10.21203/rs.3.rs-5738250/v1), 2025-02-07
Supplement: Supplementary file 3 [file 73592c96d09b464cab10b7e8.xlsx]

## Sheet: Sheet1
Taxon	Source	Voucher	Herbarium	rITS	matK	Bioproject
Anathallis obovata	NCBI					PRJNA555906
Brachionidium valerioi	NCBI	-	-	AF291098	AF265488
Draconanthes aberrans	NCBI
L. acarina	NCBI					PRJNA604559
L. adrianae	NCBI					PRJNA604559
L. ankistra	NCBI	-	-	KY988822	KY988639
L. attenboroughii	This study	LB-3150	QCNE	-	PQ479928
L. auriculata	NCBI
L. ballatrix	NCBI	-	-	-	MW498902
L. barbelifera	This study	LB-3147	QCNE	PQ470321	PQ479929
L. calodyctyion	NCBI	PQ464576	-	KY988833	KY988650	PRJNA1037538
L. calodyctyion	This study	LB-3151	QCNE	PQ464576	PQ479930
L. caprimulgus	This study					PRJNA1209138
L. carpimulgus	NCBI	-	-	KY988835	KY988652
L. ciliisepala	NCBI	-	-	-	EU214373, JQ771568
L. cloesii	NCBI	-	-	KY988837	KY988654	PRJNA692119
L. confusa	NCBI	-	-	KY988838	KY988655
L. crucitasensis	NCBI	-	-	MK703798, MK703797	MK703800
L. dactylopetala	NCBI					PRJNA1037538
L. dodsonii	NCBI					PRJNA604559
L. elata	NCBI	-	-	KY988851	KY988667
L. felis	NCBI	-	-	AF262891	-
L. felis	This study					PRJNA1209138
L. gargantua	NCBI					PRJNA604559
L. grandiflora	NCBI					PRJNA604559
L. heteroloba	NCBI					PRJNA1037538
L. hexapus	This study					PRJNA1209138
L. imitator	NCBI					PRJNA604559
L. juninensis	NCBI					PRJNA1037538, PRJNA604559
L. katlerie	NCBI					PRJNA604559
L. lucifer	This study and NCBI	LB-3148	QCNE	PQ470322	PQ479931	PRJNA604559
L. manabina	This study					PRJNA1209138
L. martineae	NCBI	-	-	KX844974	KY988685
L. matamorosii	NCBI	-	-	KY988870	KY988686
L. meniscophora	NCBI					PRJNA604559
L. monoptera	This study					PRJNA1209138
L. mucronata	NCBI	-	-	MW498971	MW498971
L. mucronata	This study					PRJNA1209138
L. mystax	NCBI	-	-	KY988875	KY988691
L. narcissus	This study					PRJNA1209138
L. nicolasii	This study					PRJNA1209138
L. niesseniae	This study	LB-3145	QCNE	PQ470323	-
L. niesseniae	NCBI					PRJNA1037538
L. nycteris	NCBI	-	-	KY988876	KY988692
L. orion	NCBI					PRJNA604559
L. pelyx	NCBI					PRJNA1037538
L. rhynchion	NCBI					PRJNA604559
L. ribes	NCBI	-	-	KY988882	KY988698
L. ribes	This study					PRJNA1209138
L. saltatrix	NCBI	-	-	KY988883	KY988699
L. speciosa	NCBI					PRJNA604559
L. tachirensis	NCBI					PRJNA692119
L. tentaculata	NCBI					PRJNA604559
L. terborchii	NCBI	-	-	KY988889	KY988705
L. terpsichore	NCBI					PRJNA604559
L. tulcanensis	This study	LB-3149	QCNE	PQ470324	PQ479932
L. volador	This study	LB-3146	QCNE	PQ470325	PQ479933
Pseudolepanthes colombiae	NCBI	-	-	MK306378	MK306416
Trichosalpinx dirhamphis	NCBI					PRJNA1037538, PRJNA604559
Zootrophion lappaceum	NCBI					PRJNA692119, PRJNA604559
