# Supplementary material for: Plastome phylogenomics of the Diverse Neotropical Orchid Genus Lepanthes with Emphasis on Subgenus Marsipanthes (Pleurothallidinae: Orchidaceae)
Source: Research Square preprint supplement (doi:10.21203/rs.3.rs-5738250/v1), 2025-02-07
Supplement: Supplementary file 4 [file ff202609a7e9f66316aa805b.xlsx]

## Sheet: Sheet1
	Total number of long repeats	Forward	Reverse	Complement	Palindromic	Tandem repeats
L. mucronata	50	16	1	1	32	21
L. hexapus	50	11	10	4	25	23
L. manabina	50	12	4	1	33	20
L. ribes	50	17	4	2	27	21
L. felis	50	18	4	2	26	23
L. nicolasii	50	14	5	1	30	17
L. monoptera	50	18	5	1	26	28
L. caprimulgus	50	18	1	0	31	38
L. narcissus	50	14	11	2	23	24
Total	450	138	45	14	253	215
